# Supplementary material
Source: PubMed Central journal article supplement (PMC2926944)
Supplement: NIHMS221403-supplement-Supplementary_Data.pdf [file NIHMS221403-supplement-Supplementary_Data.pdf]

**Supporting Information**  
**Molecular recognition of protein surfaces:**  
**High affinity ligands for the CBP KIX domain**

Stacey E. Rutledge, Heather M. Volkman and Alanna Schepartz  
 Contribution from the Department of Chemistry and Department of Molecular, Cellular  
 and Developmental Biology, Yale University, New Haven, Connecticut 06520-8107; E-  
 mail: [alanna.schepartz@yale.edu](mailto:alanna.schepartz@yale.edu)

**Table S1:** Binding and washing conditions for selections 1 & 3<sup>a</sup>

| Round          | Target protein | Temperature (°C) | Number of washes                  | Wash length (min) | Buffer          |
|----------------|----------------|------------------|-----------------------------------|-------------------|-----------------|
| 1              | GST-KIX        | 4                | 10                                | 1                 | TBST            |
| 2              | GST-KIX        | 4                | 10                                | 5                 | TBST            |
| 3              | GST-KIX        | 25               | 10                                | 2                 | TBST            |
| 4              | GST-KIX        | 25               | 10                                | 5                 | TBST            |
| 5              | GST-KIX        | 25               | 10                                | 5                 | TBST            |
| 6              | GST-KIX        | 25               | 10 <sup>b</sup> , 20 <sup>c</sup> | 5                 | TBST            |
| 7              | GST-KIX        | 25               | 10 <sup>b</sup> , 20 <sup>c</sup> | 5                 | TBST + 5 mM DTT |
| 8              | GST-KIX        | 25               | 10 <sup>b</sup> , 20 <sup>c</sup> | 5                 | TBST + 5 mM DTT |
| 9 <sup>b</sup> | GST-KIX        | 25               | 10                                | 5                 | TSBT + 5 mM DTT |

a. Selection 1 included a PKA-catalyzed phosphorylation step in each round. In all rounds, GST-KIX (30 nM) was immobilized on glutathione-coated microtiter wells. b. Selection 3 only. c. Selection 1 only.

**Table S2:** Binding and washing conditions for selections 2 & 4<sup>a</sup>

| Round | Target protein | Temperature (°C) | Number of washes | Wash length (min) | Buffer          |
|-------|----------------|------------------|------------------|-------------------|-----------------|
| 1     | GST-KIX        | 4                | 10               | 1                 | TBST            |
| 2     | HisKIX         | 4                | 10               | 5                 | PBST            |
| 3     | GST-KIX        | 4                | 10               | 5                 | TBST + 5 mM DTT |
| 4     | HisKIX         | 25               | 10               | 2                 | PBST            |
| 5     | GST-KIX        | 25               | 10               | 2                 | TBST + 5 mM DTT |

|   |         |    |    |   |                    |
|---|---------|----|----|---|--------------------|
| 6 | HisKIX  | 25 | 10 | 5 | PBST               |
| 7 | GST-KIX | 25 | 10 | 5 | TBST + 5 mM<br>DTT |
| 8 | HisKIX  | 25 | 10 | 5 | PBST               |
| 9 | GST-KIX | 25 | 10 | 5 | TSBT + 5 mM<br>DTT |

a. Selection 2 included a PKA-catalyzed phosphorylation step in each round. GST-KIX (30 nM) was immobilized on glutathione-coated microtiter wells, and HisKIX (100 nM) was immobilized on Ni-NTA-coated microtiter wells.

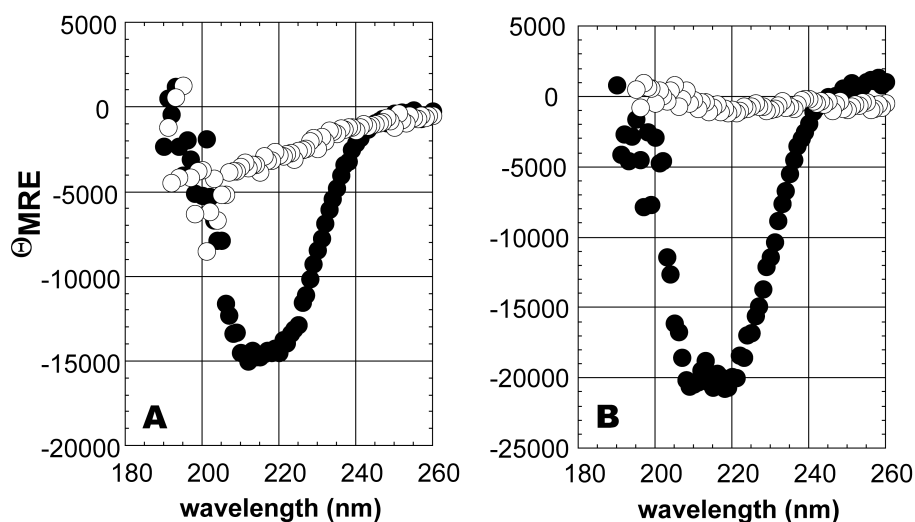

**Figure S1.** Circular dichroism spectra showing the mean residue ellipticity ( $\Theta_{\text{MRE}}$ ) of (A) PPKID4<sup>P</sup> and (B) PPKID6<sup>U</sup> at 10  $\mu\text{M}$  concentration in buffer supplemented with 0% (open symbols) or 50% (closed symbols) trifluoroethanol. CD spectra were acquired using an AVIV Model 202 spectrometer at 4

$^{\circ}\text{C}$  in 10 mM potassium phosphate buffer (pH 7) using a 1 cm pathlength CD cell (Hellma). Spectra represent the average of 3 scans (2 s time constant, 1 nm bandwidth) and were background-corrected but not smoothed.

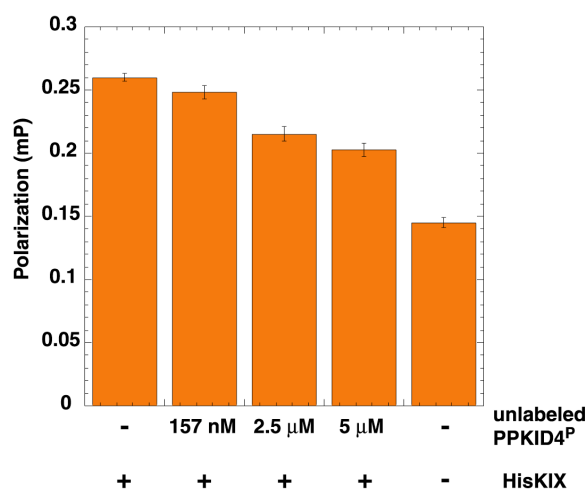

**Figure S2.** Competition between HisKIX-bound PPKID4<sup>P</sup>Flu and unlabeled PPKID4<sup>P</sup> monitored by fluorescence polarization. Error bars denote the standard deviation. As expected, the polarization of fluorescently labeled PPKID4<sup>P</sup> increases as the concentration of unlabeled competitor decreases. Polarization of fluorescently labeled PPKID4<sup>P</sup> in the absence of competitor (where 74% of PPKID4<sup>P</sup> is bound by HisKIX) and in the absence of competitor and HisKIX (unbound PPKID4<sup>P</sup>) are shown for reference. Although PPKID4<sup>P</sup> aggregates in the absence

of CBP KIX at concentrations above 10  $\mu\text{M}$ , and the change in polarization resulting from this aggregation prevents us from calculating an  $\text{IC}_{50}$  value, the data at PPKID4<sup>P</sup> concentrations below 10  $\mu\text{M}$  (at 5  $\mu\text{M}$  and 2.5  $\mu\text{M}$ ) clearly show that unlabeled PPKID4<sup>P</sup> competes effectively with PPKID4<sup>P</sup>.
